# Supplementary material
Source: PubMed Central journal article supplement (PMC7252187)
Supplement: mmc1.pdf [file mmc1.pdf]

# THE LANCET

## Respiratory Medicine

### Supplementary appendix

This appendix formed part of the original submission and has been peer reviewed. We post it as supplied by the authors.

Supplement to: Hui KPY, Cheung M-C, Perera RAPM, et al. Tropism, replication competence, and innate immune responses of the coronavirus SARS-CoV-2 in human respiratory tract and conjunctiva: an analysis in ex-vivo and in-vitro cultures. *Lancet Respir Med* 2020; published online May 7. [https://doi.org/10.1016/S2213-2600\(20\)30193-4](https://doi.org/10.1016/S2213-2600(20)30193-4).

# **Tropism, replication competence and innate immune responses of the novel coronavirus SARS-CoV-2 in human respiratory tract and conjunctiva: an analysis in *ex vivo* and *in vitro* cultures**

Kenrie PY Hui Ph.D.<sup>1</sup>, Man-Chun Cheung M.Sc.<sup>1</sup>, Ranawaka APM Perera Ph.D.<sup>1</sup>, Ka-Chun Ng B.Sc.<sup>1</sup>, Christine HT Bui Ph.D.<sup>1</sup>, John CW Ho Ph.D.<sup>1</sup>, Mandy MT Ng B.Sc.<sup>1</sup>, Denise IT Kuok Ph.D.<sup>1</sup>, Kendrick C Shih MBBS<sup>2</sup>, Sai-Wah Tsao Ph.D.<sup>3</sup>, Leo LM Poon D.Phil.<sup>1</sup>, Malik Peiris FRCPATH.<sup>1</sup>, John M Nicholls FRCPA<sup>4</sup>, Michael CW Chan Ph.D.<sup>1\*</sup>

## **Supplementary information**

### **Materials and methods**

#### **Human alveolar epithelial cells isolation**

Primary human alveolar epithelial cells were isolated using human non-malignant lung tissue obtained from patients undergoing lung resection in the Department of Surgery, Queen Mary Hospital, Hong Kong SAR, under a study approved by the Institutional Review Board of the University of Hong Kong and Hospital Authority Hong Kong West Cluster. After removing visible bronchi, the lung tissue was minced into pieces of > 0.5 mm thickness using a tissue chopper and washed with balanced salt solution (BSS) containing Hanks' balanced salt solution (Gibco, USA) with 0.7 mM sodium bicarbonate (Gibco, USA) at pH 7.4 three times to partially remove macrophages and blood cells. The tissue was digested using a combination of 0.5% trypsin (Gibco, USA) and 4 U/ml elastase (Worthington Biochemical Corporation, USA) for 40 min at 37°C in a shaking water-bath. The digestion was stopped by adding DMEM/F12 medium (Gibco, USA) with 40% FBS in and DNase I (350 U/ml) (Sigma, USA). Cell clumps were dispersed by repeatedly pipetting the cell suspension for 10 min. A disposable cell strainer (gauze size of 50 µm) (BD Bioscience, USA) was used to separate large undigested tissue fragments. The single cell suspension in the flow-through was centrifuged and resuspended in a 1:1 mixture of DMEM/F12 medium and small airway basal medium (SABM) (Lonza, USA) supplemented with 0.5 ng/ml epidermal growth factor (hEGF), 500 ng/ml epinephrine, 10 µg/ml transferrin, 5 µg/ml insulin, 0.1 ng/ml retinoic acid, 6.5 ng/ml triiodothyronine, 0.5 µg/ml hydrocortisone, 30 µg/ml bovine pituitary extract and 0.5 mg/ml BSA together with 5% FBS and 350 U/ml DNase I. The cell suspension was plated on a tissue culture grade plastic flask (Corning, USA) and incubated in a 37°C water-jacketed incubator with 5% CO<sub>2</sub> supply for 90 min. The non-adherent cells were layered on a discontinuous cold Percoll

density gradient (densities 1.089 and 1.040 g/ml) and centrifuged at 25×g for 20 min without brake. The cell layer at the interface of the two gradients was collected and washed four times with BSS to remove the Percoll. The cell suspension was incubated with magnetic beads coated with anti-CD14 antibodies at room temperature (RT) for 20 min under constant mixing. After the removal of the beads using a magnet (MACS CD14 MicroBeads), cell viability was assessed by trypan-blue exclusion. The purified pneumocyte suspension was resuspended in small airway growth medium (Lonza, USA) supplemented with 1% FBS, 100 U/ml penicillin and 100 µg/ml streptomycin and plated at a cell density of 3×10<sup>5</sup> cells/cm<sup>2</sup>. The cells were maintained in a humidified atmosphere (5% CO<sub>2</sub>, 37°C) under liquid-covered conditions and growth medium was changed daily starting from 60 h after plating the cells. When the cell layer approached 75% confluence, the pneumocytes were trypsinised and detached into Hank's buffered saline solution

### **Isolation and culture of primary human peripheral blood monocyte derived macrophages**

Peripheral blood leucocytes were separated from buffy coats of healthy blood donors from the Hong Kong Red Cross Blood Transfusion Service by centrifugation on a Ficoll-Paque density gradient and monocytes were purified by adherence on plastic petri dishes as described previously<sup>1-3</sup>. Monocytes were seeded onto tissue culture plates in RPMI 1640 medium supplemented with 5% heat-inactivated autologous plasma. The purity of the monocyte preparations was confirmed by immunostaining for the surface receptor CD14 (BD Biosciences, USA). Cells were allowed to differentiate for 14 days *in vitro* before use. Culture medium was changed to macrophage serum free medium SFM (Gibco, USA) a week before infection.

### **Infection of human alveolar epithelial cells, peripheral blood monocyte derived macrophages and Caco-2 cells**

Cells were infected with viruses at a MOI of 0.1 or two for the analysis of replication kinetics and cytokine and chemokine expression, respectively. DMEM with 2% FBS medium (Gibco, USA) with 100 U/ml penicillin and 100 µg/ml streptomycin was used as inoculum in the mock infected cells. The cell cultures were incubated with the virus inoculum for one hour in a water-jacketed 37°C incubator with 5% CO<sub>2</sub>. The cells were rinsed three times with warm PBS and replenished with the appropriate growth medium. The infected cells were harvested for mRNA collection at 24 and 48 hpi. SARS-CoV ORF1b,<sup>4</sup> MERS-CoV UpE,<sup>5</sup> influenza matrix gene were quantified using qPCR as described.<sup>6,7</sup>

### **Viral titration by TCID<sub>50</sub> assay**

A confluent 96-well tissue culture plate of Vero-E6 or MDCK cells was prepared one day before the virus titration (TCID<sub>50</sub>) assay. Cells were washed once with PBS and replenished with 2% DMEM or serum-free MEM medium supplemented with 100 units/ml penicillin and 100 µg/ml streptomycin and 2 µg/ml of TPCK (tosylsulfonyl phenylalanylchloromethyl ketone) treated trypsin for Vero-E6 and MDCK cells, respectively. Serial dilutions of virus supernatant, from 0.5 log to 7 log, were performed before adding the virus dilutions onto the plates in quadruplicate. The plates were observed for cytopathic effect daily. The end-point of viral dilution leading to CPE in 50% of inoculated wells was estimated using the Karber method.<sup>8</sup>

### **Immunohistochemical staining**

Immunohistochemical staining of the respiratory tract tissue was carried out for the SARS-CoV-2 nucleoprotein as follows. The tissue sections were microwaved in 10 mM citrate buffer pH 6.0 for 15 min to expose antigens, blocked with 10% normal horse serum for 10 min at room temperature (RT). The sections were then incubated with 4D11 antibody for 60 min at RT followed by alkaline phosphatase (AP) conjugated anti-mouse antibody (Vector Laboratory, USA) for 60 min at RT, the sections were developed with VectorRed (VR) (Vector Laboratory, USA) for 3 min. After staining for the first antigen, the sections were blocked with 3% H<sub>2</sub>O<sub>2</sub> in TBS for 10 min followed by 10% normal horse serum blocking for 10 min at RT. The sections were incubated with anti-CD68 (Dako), acetylated  $\alpha$  Tubulin (Santa Cruz) or MUC5AC (ThermoFisher) for 60 min at RT followed by horseradish peroxidase (HRP) conjugated anti-mouse antibody (Vector Laboratory, USA) for 60 min at RT, and developed with DAB (Vector Laboratory, USA) for 10 min. The nuclei were counterstained with Mayer's Hematoxylin for 10 seconds. After bluing with Scott's tap water, the sections were dehydrated and mounted with Permount. The double staining of SCGB1A1/CC10 (Protein-tech), p63-alpha (Cell Signaling Technology) with 4D11 was performed similarly as mentioned above, except after VR visualization the sections were blocked with 10% normal goat serum, followed by incubating with HRP conjugated anti-rabbit antibody (Vector Laboratory, USA) for 60 min at RT and color developed with DAB.

### **Real-time PCR assay**

The RNA of infected cells were extracted at 24 h post infection using a MiniBEST universal RNA extraction kit (Takara Biotechnology). RNA was reverse-transcribed by using oligo-dT primers with

RT-PCR kit (Takara). mRNA expression of target genes was performed using an ABI ViiA™ 7 real-time PCR system (Applied Biosystems). The gene expression profiles of cytokines and chemokines were quantified and normalized with  $\beta$ -actin as previously described<sup>1,3,9</sup>.

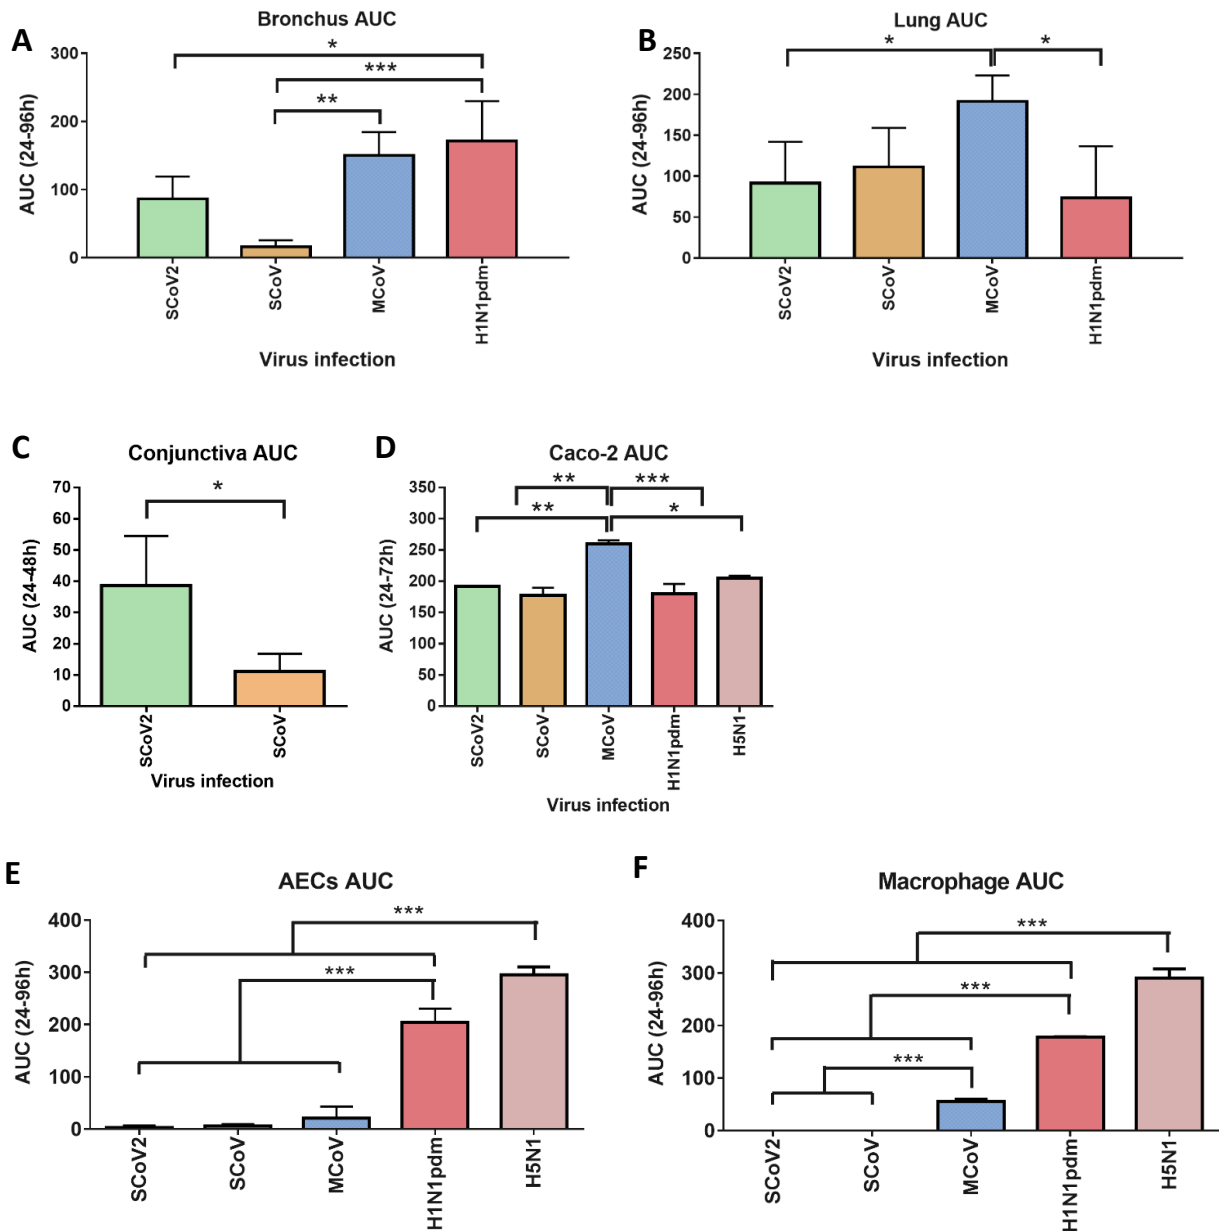

**Supplementary Figure 1. Viral replication kinetics of SARS-CoV-2 and SARS-CoV viruses in *ex vivo* cultures of human respiratory tract, conjunctiva, Caco-2 cells, AECs and macrophages.** Data from the *ex vivo* cultures of human (A) bronchus (n=5), (B) lung (n=4), (C) conjunctiva (n=3), *in vitro* cultures of (D) Caco-2 cells (n=3), (E) AECs (n=3) and (F) macrophages (n=3) in Figure 3 A-F respectively are depicted as area under the curve (AUC). Bar-charts show the data at indicated time points denoted as mean  $\pm$  standard deviation (SD). \* $p < 0.05$ . \*\* $p < 0.01$ . \*\*\* $p < 0.001$ .

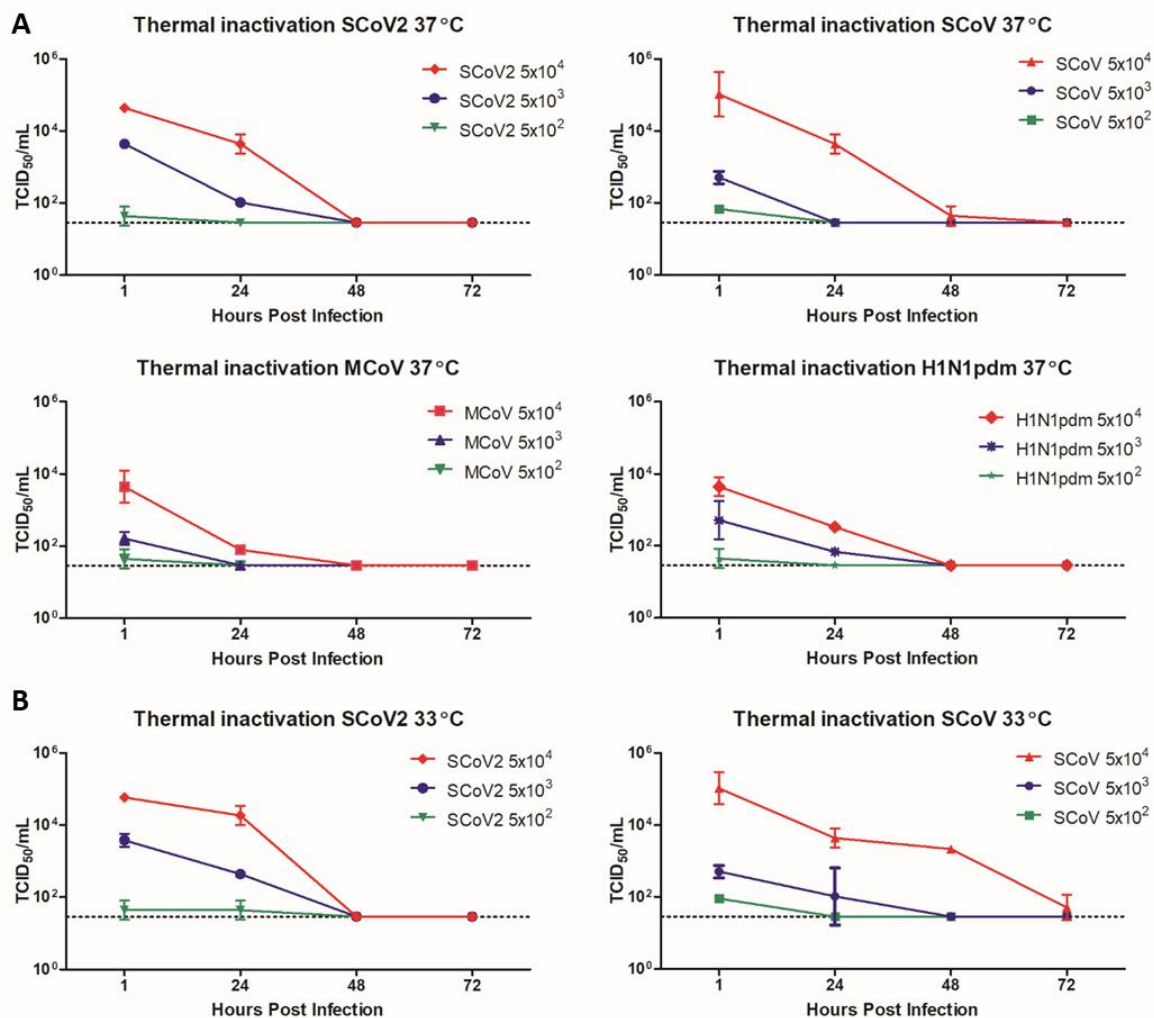

**Supplementary Figure 2. Thermal inactivation curves at 37°C and 33°C.**

Virus cultures in tissue culture wells without tissues or cells were incubated at (A) 37°C, at which human bronchus and lung tissues were incubated, and (B) 33°C, at which human conjunctiva tissues were incubated. Virus supernatants were harvested at indicated time-points for titration by TCID<sub>50</sub> assay to define the thermal inactivation of the virus in the absence of replication. Graphs show the mean virus titer from three independent experiments ± standard deviation (SD). The horizontal dotted line denotes the limit of detection in the TCID<sub>50</sub> assay.

**Supplementary Table 1. Tissue donor information**

---

| <b>Patient</b> | <b>Tissues used</b> | <b>Age</b> | <b>Gender</b> | <b>Smoking behaviour</b> | <b>Diagnoses</b>    |
|----------------|---------------------|------------|---------------|--------------------------|---------------------|
| 1              | Bronchus and lung   | 75         | F             | Non-smoker               | Lung cancer         |
| 2              | Bronchus            | 44         | M             | Unknown                  | Lung cancer         |
| 3              | Bronchus and lung   | 67         | M             | Ex-smoker                | Lung cancer         |
| 4              | Bronchus and lung   | 60         | M             | Non-smoker               | Lung cancer         |
| 5              | Bronchus and lung   | 64         | F             | Non-smoker               | Lung cancer         |
| 6              | Conjunctiva         | 70         | F             | Unknown                  | pterygium, cataract |
| 7              | Conjunctiva         | 57         | F             | Unknown                  | pterygium           |
| 8              | Conjunctiva         | 85         | F             | Unknown                  | pterygium, cataract |

---



Supplementary Table 2. Exact p values for Figure 3

| Figure                  | 3A (Bronchus)<br>Sum. P Value |         | 3B (Lung)<br>Sum. P Value |         | Figure            | 3D (Caco-2)<br>Sum. P Value |         | 3E (AECs)<br>Sum. P Value |         | 3F (Macrophage)<br>Sum. P Value |         |  |
|-------------------------|-------------------------------|---------|---------------------------|---------|-------------------|-----------------------------|---------|---------------------------|---------|---------------------------------|---------|--|
| <b>1h</b>               |                               |         |                           |         |                   |                             |         |                           |         |                                 |         |  |
| MCoV vs. SCoV2          | ns                            | >0.9999 | ns                        | >0.9999 | MCoV vs. SCoV2    | ns                          | >0.9999 | ns                        | >0.9999 | ns                              | >0.9999 |  |
| MCoV vs. SCoV           | ns                            | 0.5435  | ns                        | >0.9999 | MCoV vs. SCoV     | ns                          | >0.9999 | ns                        | >0.9999 | ns                              | >0.9999 |  |
| MCoV vs. H1N1pdm        | ns                            | >0.9999 | ns                        | >0.9999 | MCoV vs. H1N1pdm  | ns                          | 0.5113  | ns                        | >0.9999 | ****                            | <0.0001 |  |
| SCoV2 vs. SCoV          | ns                            | >0.9999 | ns                        | >0.9999 | MCoV vs. H5N1     | ns                          | 0.4958  | ns                        | 0.6731  | ****                            | <0.0001 |  |
| SCoV2 vs. H1N1pdm       | ns                            | >0.9999 | ns                        | >0.9999 | SCoV2 vs. SCoV    | ns                          | >0.9999 | ns                        | >0.9999 | ns                              | 0.426   |  |
| SCoV vs. H1N1pdm        | ns                            | >0.9999 | ns                        | >0.9999 | SCoV2 vs. H1N1pdm | ns                          | >0.9999 | ns                        | >0.9999 | ****                            | <0.0001 |  |
|                         |                               |         |                           |         | SCoV2 vs. H5N1    | ns                          | >0.9999 | ns                        | >0.9999 | **                              | 0.0072  |  |
|                         |                               |         |                           |         | SCoV vs. H1N1pdm  | ns                          | >0.9999 | ns                        | >0.9999 | ****                            | <0.0001 |  |
|                         |                               |         |                           |         | SCoV vs. H5N1     | ns                          | >0.9999 | ns                        | >0.9999 | ****                            | <0.0001 |  |
|                         |                               |         |                           |         | H1N1pdm vs. H5N1  | ns                          | >0.9999 | ns                        | >0.9999 | ****                            | <0.0001 |  |
| <b>24h</b>              |                               |         |                           |         |                   |                             |         |                           |         |                                 |         |  |
| MCoV vs. SCoV2          | ns                            | >0.9999 | ns                        | 0.0799  | MCoV vs. SCoV2    | ns                          | 0.0879  | ns                        | >0.9999 | ****                            | <0.0001 |  |
| MCoV vs. SCoV           | ns                            | >0.9999 | ns                        | 0.4713  | MCoV vs. SCoV     | **                          | 0.0042  | ns                        | >0.9999 | ****                            | <0.0001 |  |
| MCoV vs. H1N1pdm        | *                             | 0.0174  | ns                        | >0.9999 | MCoV vs. H1N1pdm  | ****                        | <0.0001 | ***                       | 0.0007  | ****                            | <0.0001 |  |
| SCoV2 vs. SCoV          | ns                            | >0.9999 | ns                        | >0.9999 | SCoV vs. H1N1pdm  | ns                          | 0.9788  | ****                      | <0.0001 | ****                            | <0.0001 |  |
| SCoV2 vs. H1N1pdm       | **                            | 0.0056  | ns                        | >0.9999 | SCoV2 vs. SCoV    | ns                          | >0.9999 | ns                        | >0.9999 | ns                              | >0.9999 |  |
| SCoV vs. H1N1pdm        | *                             | 0.011   | ns                        | >0.9999 | SCoV2 vs. H1N1pdm | *                           | 0.0499  | ***                       | 0.0003  | ****                            | <0.0001 |  |
|                         |                               |         |                           |         | SCoV2 vs. H5N1    | ns                          | >0.9999 | ****                      | <0.0001 | ****                            | <0.0001 |  |
|                         |                               |         |                           |         | SCoV vs. H1N1pdm  | ns                          | 0.555   | ***                       | 0.0002  | ****                            | <0.0001 |  |
|                         |                               |         |                           |         | SCoV vs. H5N1     | ns                          | >0.9999 | ****                      | <0.0001 | ****                            | <0.0001 |  |
|                         |                               |         |                           |         | H1N1pdm vs. H5N1  | *                           | 0.0223  | ****                      | <0.0001 | ****                            | <0.0001 |  |
| <b>48h</b>              |                               |         |                           |         |                   |                             |         |                           |         |                                 |         |  |
| MCoV vs. SCoV2          | ns                            | >0.9999 | ****                      | <0.0001 | MCoV vs. SCoV2    | ****                        | <0.0001 | ns                        | >0.9999 | ****                            | <0.0001 |  |
| MCoV vs. SCoV           | ns                            | 0.0593  | **                        | 0.0045  | MCoV vs. SCoV     | ****                        | <0.0001 | ns                        | >0.9999 | ****                            | <0.0001 |  |
| MCoV vs. H1N1pdm        | ns                            | 0.2411  | ***                       | 0.0009  | MCoV vs. H1N1pdm  | ****                        | <0.0001 | ****                      | <0.0001 | ****                            | <0.0001 |  |
| SCoV2 vs. SCoV          | ns                            | >0.9999 | ns                        | >0.9999 | MCoV vs. H5N1     | **                          | 0.0015  | ****                      | <0.0001 | ****                            | <0.0001 |  |
| SCoV2 vs. H1N1pdm       | *                             | 0.0232  | ns                        | >0.9999 | SCoV2 vs. SCoV    | ns                          | >0.9999 | ns                        | >0.9999 | ns                              | >0.9999 |  |
| SCoV vs. H1N1pdm        | ***                           | 0.0002  | ns                        | >0.9999 | SCoV2 vs. H1N1pdm | ns                          | >0.9999 | ****                      | <0.0001 | ****                            | <0.0001 |  |
|                         |                               |         |                           |         | SCoV2 vs. H5N1    | ns                          | >0.9999 | ****                      | <0.0001 | ****                            | <0.0001 |  |
|                         |                               |         |                           |         | SCoV vs. H1N1pdm  | ns                          | >0.9999 | ****                      | <0.0001 | ****                            | <0.0001 |  |
|                         |                               |         |                           |         | SCoV vs. H5N1     | ns                          | >0.9999 | ****                      | <0.0001 | ****                            | <0.0001 |  |
|                         |                               |         |                           |         | H1N1pdm vs. H5N1  | ns                          | >0.9999 | ****                      | <0.0001 | ****                            | <0.0001 |  |
| <b>72h</b>              |                               |         |                           |         |                   |                             |         |                           |         |                                 |         |  |
| MCoV vs. SCoV2          | ns                            | >0.9999 | *                         | 0.044   | MCoV vs. SCoV2    | *                           | 0.0174  | ns                        | >0.9999 | ****                            | <0.0001 |  |
| MCoV vs. SCoV           | *                             | 0.0427  | ns                        | 0.1665  | MCoV vs. SCoV     | ns                          | >0.9999 | ns                        | >0.9999 | ****                            | <0.0001 |  |
| MCoV vs. H1N1pdm        | ns                            | >0.9999 | **                        | 0.0017  | MCoV vs. H1N1pdm  | *                           | 0.0222  | ****                      | <0.0001 | ****                            | <0.0001 |  |
| SCoV2 vs. SCoV          | *                             | 0.047   | ns                        | >0.9999 | MCoV vs. H5N1     | ns                          | 0.2099  | ****                      | <0.0001 | ****                            | <0.0001 |  |
| SCoV2 vs. H1N1pdm       | ns                            | >0.9999 | ns                        | >0.9999 | SCoV2 vs. SCoV    | ns                          | 0.9631  | ns                        | >0.9999 | ns                              | >0.9999 |  |
| SCoV vs. H1N1pdm        | ns                            | 0.0921  | ns                        | 0.5811  | SCoV2 vs. H1N1pdm | ns                          | >0.9999 | ****                      | <0.0001 | ****                            | <0.0001 |  |
|                         |                               |         |                           |         | SCoV2 vs. H5N1    | ns                          | >0.9999 | ****                      | <0.0001 | ****                            | <0.0001 |  |
|                         |                               |         |                           |         | SCoV vs. H1N1pdm  | ns                          | 0.9454  | ****                      | <0.0001 | ****                            | <0.0001 |  |
|                         |                               |         |                           |         | SCoV vs. H5N1     | ns                          | >0.9999 | ****                      | <0.0001 | ****                            | <0.0001 |  |
|                         |                               |         |                           |         | H1N1pdm vs. H5N1  | ns                          | >0.9999 | ns                        | >0.9999 | ****                            | <0.0001 |  |
| <b>96h</b>              |                               |         |                           |         |                   |                             |         |                           |         |                                 |         |  |
| MCoV vs. SCoV2          | ns                            | >0.9999 | ns                        | 0.1148  | MCoV vs. SCoV2    | --                          |         | ns                        | 0.7809  | ****                            | <0.0001 |  |
| MCoV vs. SCoV           | ****                          | <0.0001 | ns                        | 0.2505  | MCoV vs. SCoV     | --                          |         | ns                        | 0.7809  | ****                            | <0.0001 |  |
| MCoV vs. H1N1pdm        | ns                            | >0.9999 | ***                       | 0.0002  | MCoV vs. H1N1pdm  | --                          |         | ns                        | 0.2837  | ****                            | <0.0001 |  |
| SCoV2 vs. SCoV          | **                            | 0.0017  | ns                        | >0.9999 | MCoV vs. H5N1     | --                          |         | ****                      | <0.0001 | ****                            | <0.0001 |  |
| SCoV2 vs. H1N1pdm       | ns                            | >0.9999 | ns                        | 0.1285  | SCoV2 vs. SCoV    | --                          |         | ns                        | >0.9999 | ns                              | >0.9999 |  |
| SCoV vs. H1N1pdm        | *                             | 0.0332  | ns                        | 0.0949  | SCoV2 vs. H1N1pdm | --                          |         | **                        | 0.003   | ****                            | <0.0001 |  |
|                         |                               |         |                           |         | SCoV2 vs. H5N1    | --                          |         | ****                      | <0.0001 | ****                            | <0.0001 |  |
|                         |                               |         |                           |         | SCoV vs. H1N1pdm  | --                          |         | **                        | 0.003   | ****                            | <0.0001 |  |
|                         |                               |         |                           |         | SCoV vs. H5N1     | --                          |         | ****                      | <0.0001 | ****                            | <0.0001 |  |
|                         |                               |         |                           |         | H1N1pdm vs. H5N1  | --                          |         | ****                      | <0.0001 | ****                            | <0.0001 |  |
| <b>3C (Conjunctiva)</b> |                               |         |                           |         |                   |                             |         |                           |         |                                 |         |  |
| Figure                  | Sum. P Value                  |         |                           |         |                   |                             |         |                           |         |                                 |         |  |
| SCoV2 - SCoV            |                               |         |                           |         |                   |                             |         |                           |         |                                 |         |  |
| 1h                      | ns                            | >0.9999 |                           |         |                   |                             |         |                           |         |                                 |         |  |
| 24h                     | ns                            | 0.9644  |                           |         |                   |                             |         |                           |         |                                 |         |  |
| 48h                     | **                            | 0.0017  |                           |         |                   |                             |         |                           |         |                                 |         |  |

## References

1. Hui KP, Lee SM, Cheung CY, et al. Induction of proinflammatory cytokines in primary human macrophages by influenza A virus (H5N1) is selectively regulated by IFN regulatory factor 3 and p38 MAPK. *Journal of immunology (Baltimore, Md : 1950)* 2009; **182**(2): 1088-98.
2. Cheung CY, Poon LL, Lau AS, et al. Induction of proinflammatory cytokines in human macrophages by influenza A (H5N1) viruses: a mechanism for the unusual severity of human disease? *Lancet* 2002; **360**(9348): 1831-7.
3. Hui KP, Lee SM, Cheung CY, et al. H5N1 influenza virus-induced mediators upregulate RIG-I in uninfected cells by paracrine effects contributing to amplified cytokine cascades. *The Journal of infectious diseases* 2011; **204**(12): 1866-78.
4. Chu DKW, Pan Y, Cheng SMS, et al. Molecular Diagnosis of a Novel Coronavirus (2019-nCoV) Causing an Outbreak of Pneumonia. *Clinical chemistry* 2020.
5. Chu DKW, Hui KPY, Perera R, et al. MERS coronaviruses from camels in Africa exhibit region-dependent genetic diversity. *Proceedings of the National Academy of Sciences of the United States of America* 2018; **115**(12): 3144-9.
6. Chan MC, Cheung CY, Chui WH, et al. Proinflammatory cytokine responses induced by influenza A (H5N1) viruses in primary human alveolar and bronchial epithelial cells. *Respir Res* 2005; **6**: 135.
7. Chan MC, Chan RW, Yu WC, et al. Influenza H5N1 virus infection of polarized human alveolar epithelial cells and lung microvascular endothelial cells. *Respir Res* 2009; **10**(1): 102.
8. Karber G. 50% end-point calculation. *Arch Exp Pathol Pharmacol* 1931; **162**: 480-3.
9. Chan RW, Chan MC, Wong AC, et al. DAS181 inhibits H5N1 influenza virus infection of human lung tissues. *Antimicrob Agents Chemother* 2009; **53**(9): 3935-41.
